# Supplementary material for: Structural and magnetic properties of mixed Co–Ln (Ln = Nd, Sm, Eu, Gd and Ho) diethyleneglycolate complexes
Source: Royal Society of Chemistry journal article supplement (doi:10.1039/c5dt02346g), 2015-01-01
Supplement: c5dt02346g2.pdf [file c5dt02346g2.pdf]

## Supporting information

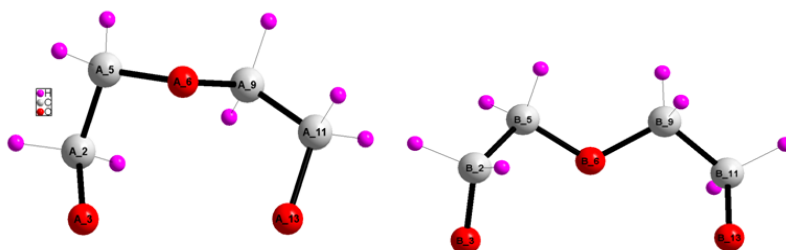

**Figure S1.** Diethyleneglycolate coordination mode on the Eu and Co metal cations (deg\_A on left and deg\_B on right). O and C atoms are in red and light grey, respectively.

**Table S1.** ‘Relaxed’ geometrical parameters of deg\_A and deg\_B molecules used in the Rietveld refinement of CoEu-based complex

| deg_A         |               | deg_B         |               |
|---------------|---------------|---------------|---------------|
| Atoms         | Distances (Å) | Atoms         | Distances (Å) |
| A_3-A_2       | 1.402         | B_3-B_2       | 1.396         |
| A_2-A_5       | 1.516         | B_2-B_5       | 1.491         |
| A_5-A_6       | 1.419         | B_5-B_6       | 1.419         |
| A_6-A_9       | 1.408         | B_6-B_9       | 1.436         |
| A_9-A_11      | 1.492         | B_9-B_11      | 1.493         |
| A_11-A_13     | 1.505         | B_11-B_13     | 1.428         |
|               | Angles (°)    |               | Angles (°)    |
| A_3-A_2-A_5   | 111.65        | B_3-B_2-B_5   | 114.97        |
| A_2-A_5-A_6   | 108.78        | B_2-B_5-B_6   | 107.1         |
| A_5-A_6-A_9   | 113.88        | B_5-B_6-B_9   | 115.66        |
| A_6-A_9-A_11  | 106.85        | B_6-B_9-B_11  | 107.69        |
| A_9-A_11-A_13 | 110.84        | B_9-B_11-B_13 | 109.63        |

**Table S2.** Fractional atomic coordinates of the CoEu-based complex

| Code Atom | Atom | X           | Y            | Z           | U          |
|-----------|------|-------------|--------------|-------------|------------|
| A_1       | H    | 0.35210     | 0.70794      | 0.60945     | 0.0558(33) |
| A_2       | C    | 0.38471     | 0.72296      | 0.56574     | 0.0558(33) |
| A_3       | O    | 0.46067     | 0.65622      | 0.60626     | 0.0558(33) |
| A_4       | H    | 0.33724     | 0.69895      | 0.48272     | 0.0558(33) |
| A_5       | C    | 0.40422     | 0.85089      | 0.57050     | 0.0558(33) |
| A_6       | O    | 0.45283     | 0.87030      | 0.52221     | 0.0558(33) |
| A_7       | H    | 0.44083     | 0.87931      | 0.65386     | 0.0558(33) |
| A_8       | H    | 0.34930     | 0.89440      | 0.53440     | 0.0558(33) |
| A_9       | C    | 0.40271     | 0.86393      | 0.41146     | 0.0558(33) |
| A_10      | H    | 0.35175     | 0.79626      | 0.38311     | 0.0558(33) |
| A_11      | C    | 0.46421     | 0.83605      | 0.37642     | 0.0558(33) |
| A_12      | H    | 0.36946     | 0.94651      | 0.37567     | 0.0558(33) |
| A_13      | O    | 0.51184     | 0.72488      | 0.42515     | 0.0558(33) |
| A_14      | H    | 0.50937     | 0.90939      | 0.39592     | 0.0558(33) |
| A_15      | H    | 0.42654     | 0.82537      | 0.28992     | 0.0558(33) |
| B_1       | H    | 0.69258     | 0.64037      | 0.29361     | 0.0387(29) |
| B_2       | C    | 0.66228     | 0.62952      | 0.34054     | 0.0387(29) |
| B_3       | O    | 0.58888     | 0.55945      | 0.28326     | 0.0387(29) |
| B_4       | H    | 0.64232     | 0.71669      | 0.35037     | 0.0387(29) |
| B_5       | C    | 0.72970     | 0.58391      | 0.44620     | 0.0387(29) |
| B_6       | O    | 0.68502     | 0.54137      | 0.49398     | 0.0387(29) |
| B_7       | H    | 0.76220     | 0.52450      | 0.43780     | 0.0387(29) |
| B_8       | H    | 0.77596     | 0.65314      | 0.49389     | 0.0387(29) |
| B_9       | C    | 0.72411     | 0.56828      | 0.60368     | 0.0387(29) |
| B_10      | H    | 0.79162     | 0.53503      | 0.65140     | 0.0387(29) |
| B_11      | C    | 0.66993     | 0.51312      | 0.64020     | 0.0387(29) |
| B_12      | H    | 0.72671     | 0.66237      | 0.61710     | 0.0387(29) |
| B_13      | O    | 0.58191     | 0.55279      | 0.57712     | 0.0387(29) |
| B_14      | H    | 0.69794     | 0.53525      | 0.72404     | 0.0387(29) |
| B_15      | H    | 0.67348     | 0.41901      | 0.63465     | 0.0387(29) |
| Eu        | Eu   | 0.97764(9)  | 0.03876(13)  | 0.11280(12) | 0.0066(9)  |
| Co        | Co   | 0.04284(24) | -0.21920(32) | 0.07607(30) | 0.007(2)   |
| Cl        | Cl   | 0.15963(44) | 0.31010(59)  | 0.70874(54) | 0.0630(32) |

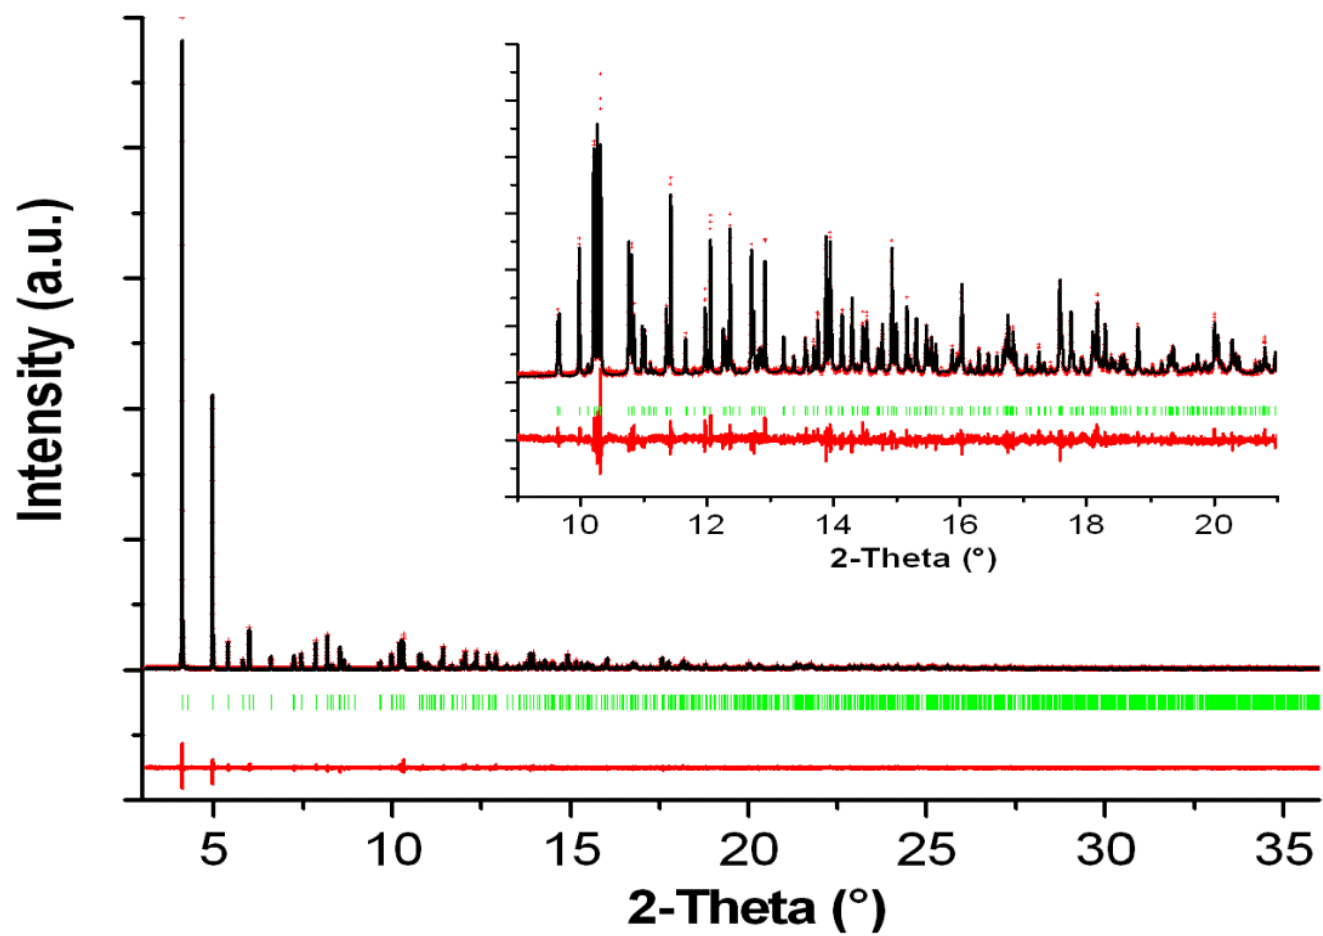

**Figure S2.** Experimental and Rietveld refined XRD pattern of the as-produced CoEu based-complex superposed to the experimental one recorded on synchrotron facilities.

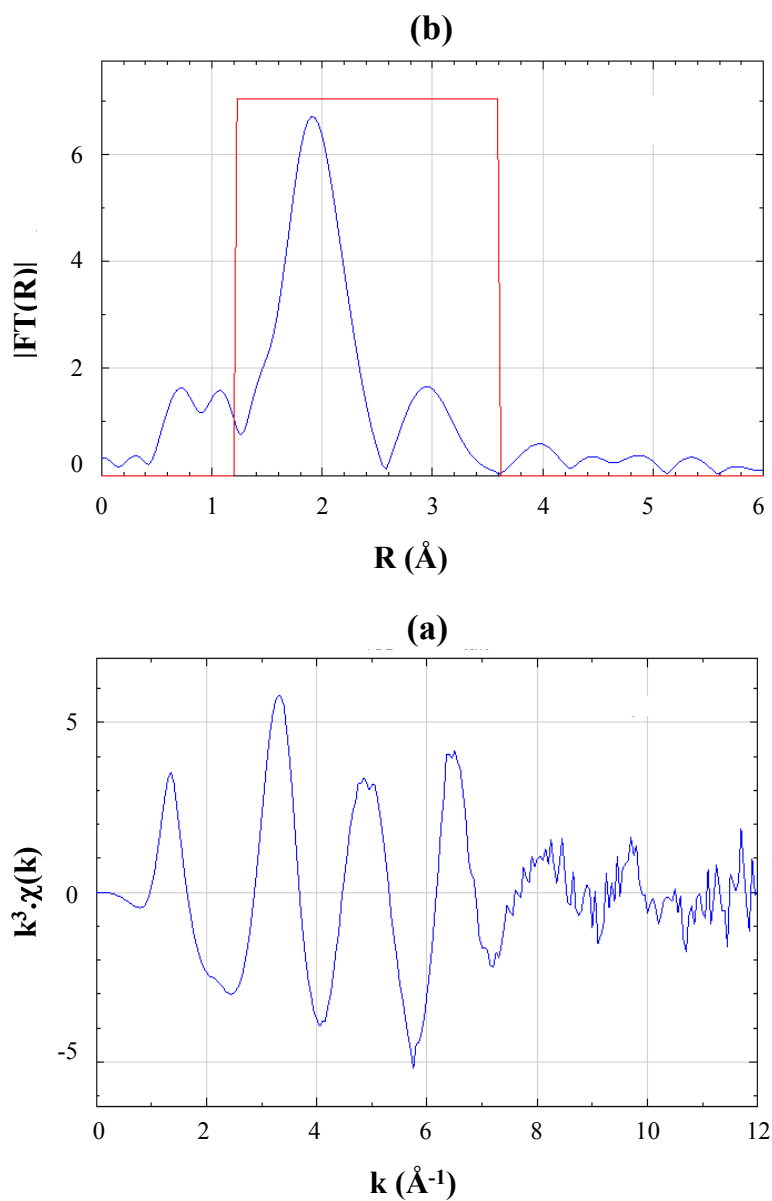

**Figure S3.**  $k^3$ -weighted total EXAFS interference function as a function of the wavevector  $k$  of the photoelectron (a) and the Moduli of the Fourier transforms of the EXAFS (not corrected from the electron phase shift) (b), at  $L_3$  threshold of Eu in in the CoEu-based complex. The filter window related to the first back-scatterer atom shells was plotted in red on the FT moduli curve.

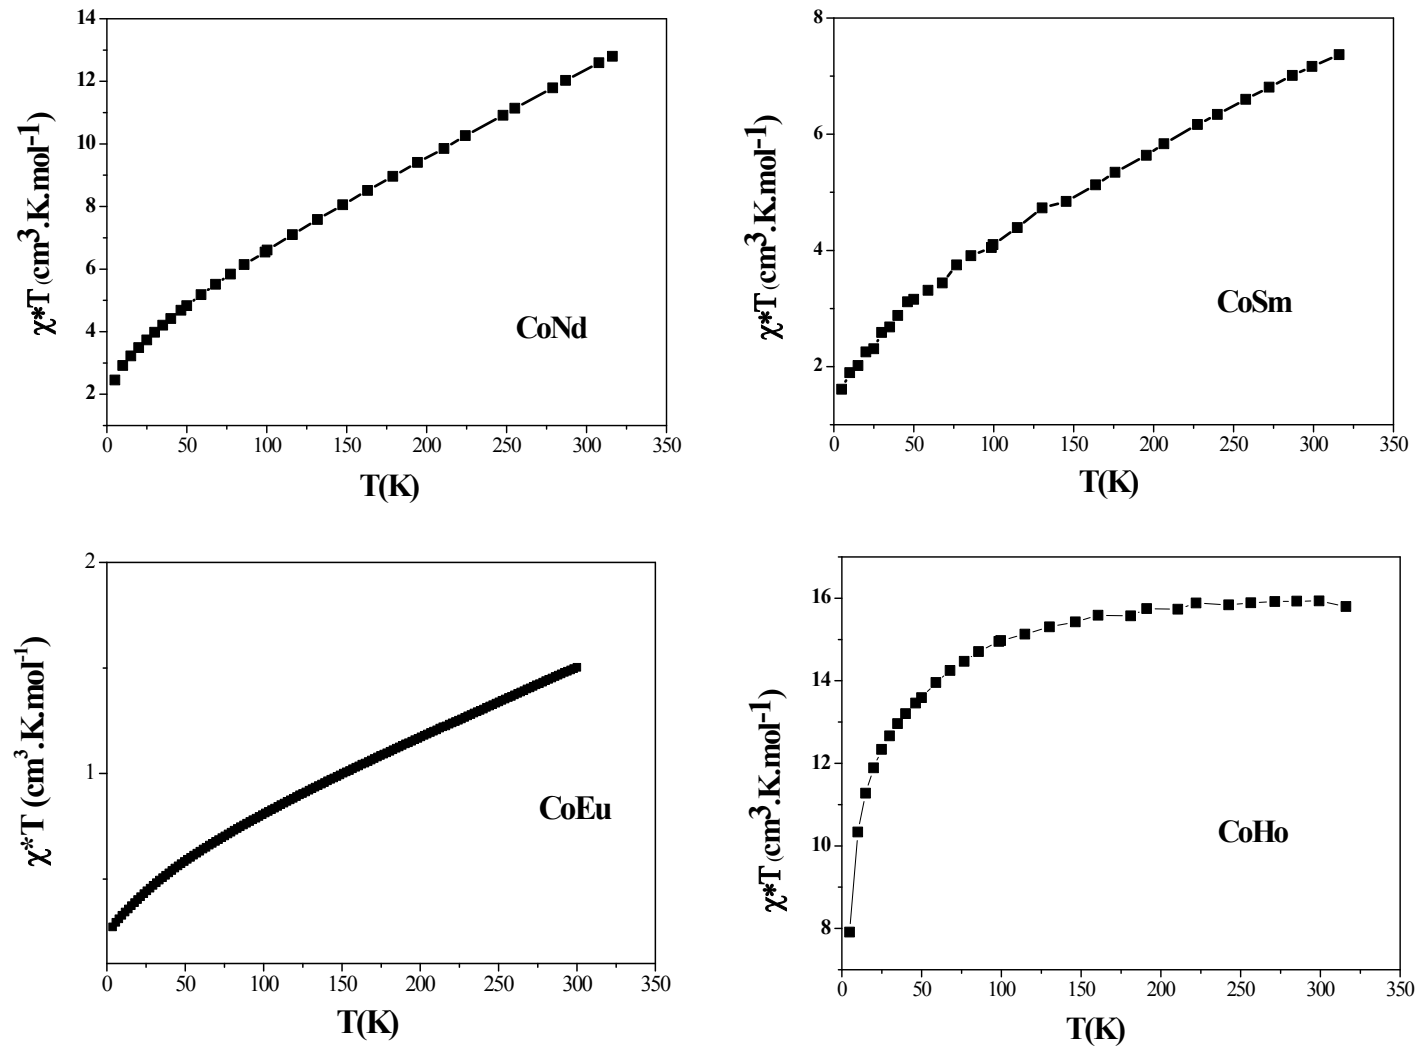

**Figure S4.** The temperature dependence of the product  $\chi \cdot T$  of  $\text{CoLnCl}(\text{deg})_2$ ,  $\text{Ln} = \text{Nd, Sm, Eu}$  and  $\text{Ho}$ , as collected under a field of 500 Oe.

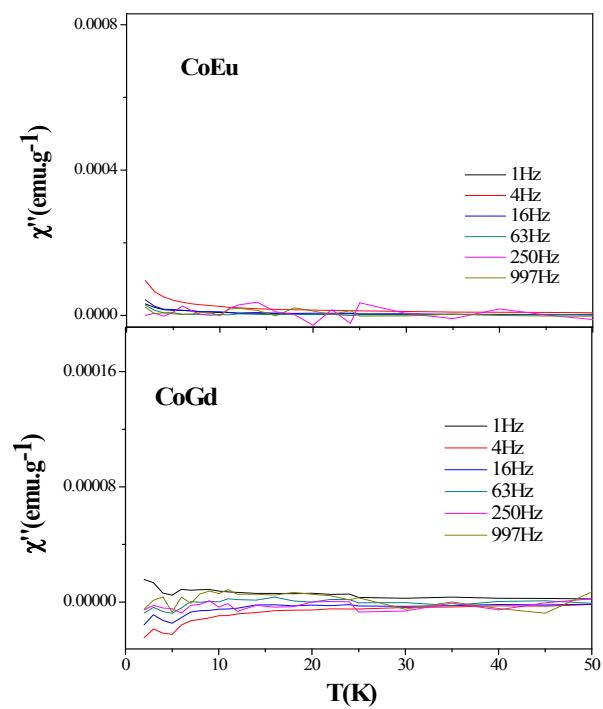

**Figure S5.** Thermal variation of the out-of-plane ac-susceptibility ( $\chi''$ ) of  $\text{CoEuCl}(\text{deg})_2$  and  $\text{CoGdCl}(\text{deg})_2$ , for frequencies ranging between 1 and 1000 Hz.
